# Supplementary material for: Analytical and clinical validation of an amplicon-based next generation sequencing assay for ultrasensitive detection of circulating tumor DNA
Source: PLoS One. 2022 Apr 29;17(4):e0267389. doi: 10.1371/journal.pone.0267389 (PMC9053827; doi:10.1371/journal.pone.0267389)
Supplement: S4 Table — (XLSX) [file pone.0267389.s011.xlsx]

## Sheet: S4 Table
Sample ID (FFPE DNA)	PDL1-3'UTR structural variant detected by WGS, targeted or Sanger Sequencing	Breakpoint of PD-L1 structural variant by LiquidHALLMARK	LiquidHALLMARK VAF (%) of PD-L1 structural variant	Concordance
PDL1-1	Yes	chr9:5467953	0.1587	Yes
PDL1-2	Yes	chr9:5468367	0.6815	Yes
PDL1-3	Yes	chr9:5465811	0.4322	Yes
PDL1-4	No	-	NA	Yes
PDL1-5	No	-	NA	Yes
PDL1-6	No	-	NA	Yes
PDL1-7	No	-	NA	Yes
PDL1-8	No	-	NA	Yes
PDL1-9	No	-	NA	Yes
PDL1-10	No	-	NA	Yes
PDL1-11	No	-	NA	Yes
PDL1-12	No	-	NA	Yes
PDL1-13	No	-	NA	Yes
PDL1-14	Yes	chr9:5467890	0.3539	Yes
PDL1-15	No	-	NA	Yes
PDL1-16	No	-	NA	Yes
PDL1-17	No	-	NA	Yes
PDL1-18	Yes	chr9:5466771	0.597	Yes
PDL1-19	No	-	NA	Yes
PDL1-20	No	-	NA	Yes
PDL1-21	No	-	NA	Yes
PDL1-22	No	-	NA	Yes
PDL1-23	Yes	chr9:5467897	0.2364	Yes
PDL1-24	No	-	NA	Yes
PDL1-25	No	-	NA	Yes
PDL1-26	Yes	chr9:5467887	0.0317	Yes
PDL1-27	Yes	chr9:5466987	0.3333	Yes
PDL1-28	No		NA	Yes
PDL1-29	Yes	chr9:5467931	0.3226	Yes
	Reference assay (WGS, targeted, or Sanger Sequencing)
LiquidHALLMARK (FFPE DNA)		Positive	Negative	Total
	Positive	9	0	9
	Negative	0	20	20
	Total	9	20	29
	PPA	100% (95% CI: 70.09 – 100%)
	NPA	100% (95% CI: 83.89 – 100%)
	OPA	100% (95% CI: 88.30 – 100%)
WGS, whole genome sequencing; PPA, positive percent agreement; NPA, negative percent agreement; OPA, overall percent agreement.
